# Supplementary material for: Oncogenes without a Neighboring Tumor-Suppressor Gene Are More Prone to Amplification
Source: PubMed Central journal article supplement — Mol Biol Evol. 2017 Jan 12;34(4):903–7. doi: 10.1093/molbev/msw295 (PMC5400371; doi:10.1093/molbev/msw295), 2017-01-12
Supplement: msw295_Supp.pdf [file msw295_Supp.pdf]

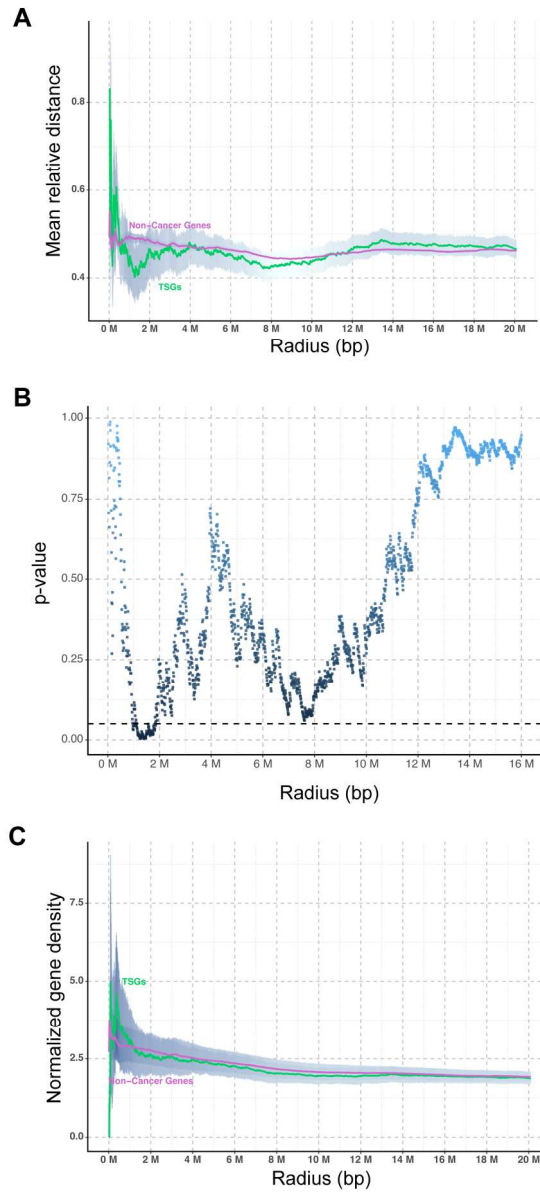

Supplementary Figure 1 Conservation of close physical proximity between oncogenes and TSGs in the mouse genome. The number of homologous oncogenes, homologous TSGs and non-cancer genes included in the analysis are 50, 932 and 42,678, respectively. (A) The mean relative distance, (B) p-value from permutation test, and (C) normalized gene density are shown.

110x231mm (300 x 300 DPI)

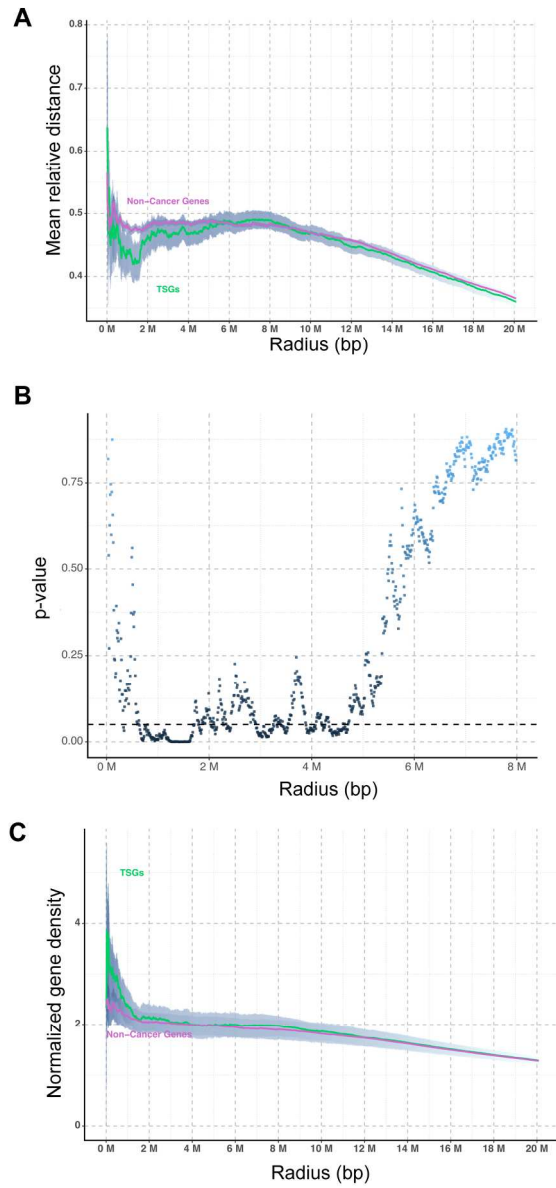

Conservation of close physical proximity between oncogenes and TSGs in the drosophila genome. The number of homologous oncogenes, homologous TSGs and non-cancer genes included in the analysis are 25, 634 and 16,748, respectively. (A) The mean relative distance, (B) p-value from permutation test, and (C) normalized gene density are shown.

111x232mm (300 x 300 DPI)
